# Supplementary material
Source: ML conference proceedings conference paper supplement (https://openaccess.thecvf.com/content/WACV2025/html/Moodley_I3D-AE-LSTM_A_2-Stream_WACV_2025_paper.html)

## Execution Phase (Capture just before ball contact with bat)

### (Front foot)

Off-Drive

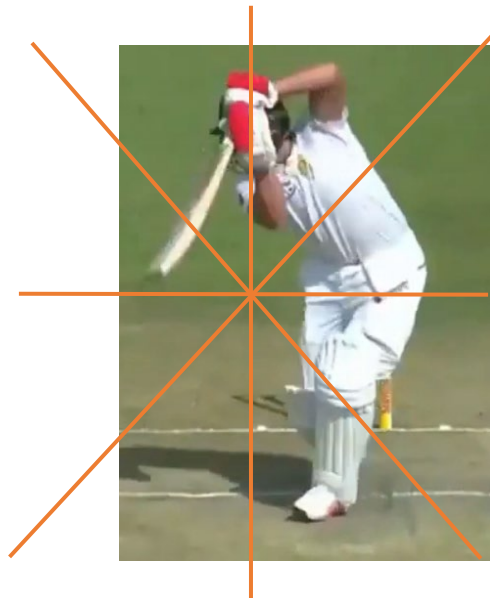

| Body Part    | Rule                                                                                                                                                                                                                                                                 | Scoring Metric                                                                                                                                                                                      | Points                                                                                                  |
|--------------|----------------------------------------------------------------------------------------------------------------------------------------------------------------------------------------------------------------------------------------------------------------------|-----------------------------------------------------------------------------------------------------------------------------------------------------------------------------------------------------|---------------------------------------------------------------------------------------------------------|
| Head (He)    | <ul style="list-style-type: none"> <li>○ Must be in line with feet</li> <li>○ Threshold – measure the head angle on either side</li> <li>○ Use the horizontal line</li> </ul>                                                                                        | <ul style="list-style-type: none"> <li>○ <math>He = 0'</math></li> <li>○ <math>0' &lt; He &lt; 7'</math></li> <li>○ <math>7' &lt; He &lt; 15'</math></li> <li>○ <math>He &gt; 15'</math></li> </ul> | <ul style="list-style-type: none"> <li>○ 0</li> <li>○ 5 to 10</li> <li>○ 0 to 5</li> <li>○ 0</li> </ul> |
| Shoulder (S) | <ul style="list-style-type: none"> <li>○ Must be side on</li> <li>○ Shoulders should be in line with each other</li> <li>○ Threshold – measure the angle between the shoulders</li> <li>○ Use the horizontal line</li> </ul>                                         | <ul style="list-style-type: none"> <li>○ <math>S = 0'</math></li> <li>○ <math>0' &lt; S &lt; 7'</math></li> <li>○ <math>7' &lt; S &lt; 15'</math></li> <li>○ <math>S &gt; 15'</math></li> </ul>     | <ul style="list-style-type: none"> <li>○ 0</li> <li>○ 5 to 10</li> <li>○ 0 to 5</li> <li>○ 0</li> </ul> |
| Hands (Ha)   | <ul style="list-style-type: none"> <li>○ Directly below the batter's eyes</li> <li>○ Use the vertical line (acts as a number line)</li> <li>○ The further away from head the worse</li> <li>○ Line is from 0 - 4</li> </ul>                                          | <ul style="list-style-type: none"> <li>○ <math>Ha = 0</math></li> <li>○ <math>0 &gt; Ha &lt; 2</math></li> <li>○ <math>2 &gt; Ha &lt; 4</math></li> <li>○ <math>Ha &gt; 4</math></li> </ul>         | <ul style="list-style-type: none"> <li>○ 0</li> <li>○ 5 to 10</li> <li>○ 0 to 5</li> <li>○ 0</li> </ul> |
| Hips (Hi)    | <ul style="list-style-type: none"> <li>○ Must be side on</li> <li>○ Hips should be in line with each other</li> <li>○ Threshold – measure the distance between the hips</li> <li>○ Use the horizontal line as a number line</li> <li>○ Line is from 0 - 4</li> </ul> | <ul style="list-style-type: none"> <li>○ <math>Hi = 0</math></li> <li>○ <math>0 &gt; Hi &lt; 2</math></li> <li>○ <math>2 &gt; Hi &lt; 4</math></li> <li>○ <math>Hi &gt; 4</math></li> </ul>         | <ul style="list-style-type: none"> <li>○ 0</li> <li>○ 5 to 10</li> <li>○ 0 to 5</li> <li>○ 0</li> </ul> |
| Feet (F)     | <ul style="list-style-type: none"> <li>○ Must be in line with head</li> </ul>                                                                                                                                                                                        | <ul style="list-style-type: none"> <li>○ <math>F = 0'</math></li> </ul>                                                                                                                             | <ul style="list-style-type: none"> <li>○ 0</li> </ul>                                                   |

|  |                                                                                                                                          |                                                                                                                                                                  |                                                                                            |
|--|------------------------------------------------------------------------------------------------------------------------------------------|------------------------------------------------------------------------------------------------------------------------------------------------------------------|--------------------------------------------------------------------------------------------|
|  | <ul style="list-style-type: none"> <li>○ Threshold – measure the feet angle on either side</li> <li>○ Use the horizontal line</li> </ul> | <ul style="list-style-type: none"> <li>○ <math>0' &lt; F &lt; 7'</math></li> <li>○ <math>7' &lt; F &lt; 15'</math></li> <li>○ <math>F &gt; 15'</math></li> </ul> | <ul style="list-style-type: none"> <li>○ 5 to 10</li> <li>○ 0 to 5</li> <li>○ 0</li> </ul> |
|--|------------------------------------------------------------------------------------------------------------------------------------------|------------------------------------------------------------------------------------------------------------------------------------------------------------------|--------------------------------------------------------------------------------------------|

Example score for FF Off-Drive

|           |       |
|-----------|-------|
| Head      | 10/10 |
| Shoulders | 4/10  |
| Hands     | 10/10 |
| Hips      | 6/10  |
| Feet      | 10/10 |

On-Drive

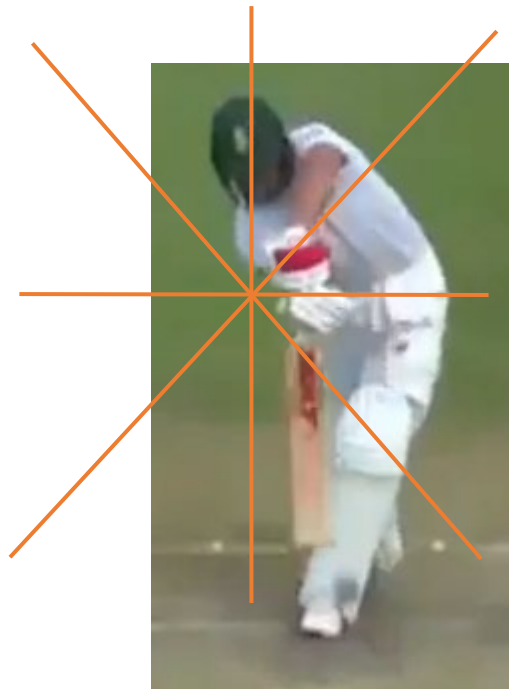

| Body Part    | Rule                                                                                                                                                                                                                         | Scoring Metric                                                                                                                                                                                      | Points                                                                                                  |
|--------------|------------------------------------------------------------------------------------------------------------------------------------------------------------------------------------------------------------------------------|-----------------------------------------------------------------------------------------------------------------------------------------------------------------------------------------------------|---------------------------------------------------------------------------------------------------------|
| Head (He)    | <ul style="list-style-type: none"> <li>○ Must be in line with feet</li> <li>○ Threshold – measure the head angle on either side</li> <li>○ Use the horizontal line</li> </ul>                                                | <ul style="list-style-type: none"> <li>○ <math>He = 0'</math></li> <li>○ <math>0' &lt; He &lt; 7'</math></li> <li>○ <math>7' &lt; He &lt; 15'</math></li> <li>○ <math>He &gt; 15'</math></li> </ul> | <ul style="list-style-type: none"> <li>○ 0</li> <li>○ 5 to 10</li> <li>○ 0 to 5</li> <li>○ 0</li> </ul> |
| Shoulder (S) | <ul style="list-style-type: none"> <li>○ Must be side on</li> <li>○ Shoulders should be in line with each other</li> <li>○ Threshold – measure the angle between the shoulders</li> <li>○ Use the horizontal line</li> </ul> | <ul style="list-style-type: none"> <li>○ <math>S = 0'</math></li> <li>○ <math>0' &lt; S &lt; 7'</math></li> <li>○ <math>7' &lt; S &lt; 15'</math></li> <li>○ <math>S &gt; 15'</math></li> </ul>     | <ul style="list-style-type: none"> <li>○ 0</li> <li>○ 5 to 10</li> <li>○ 0 to 5</li> <li>○ 0</li> </ul> |
| Hands (Ha)   | <ul style="list-style-type: none"> <li>○ Directly below the batter's eyes</li> </ul>                                                                                                                                         | <ul style="list-style-type: none"> <li>○ <math>Ha = 0</math></li> <li>○ <math>0 &gt; Ha &lt; 2</math></li> </ul>                                                                                    | <ul style="list-style-type: none"> <li>○ 0</li> <li>○ 5 to 10</li> </ul>                                |

|           |                                                                                                                                                                                                                                                                      |                                                                                                                                                                                                 |                                                                                                         |
|-----------|----------------------------------------------------------------------------------------------------------------------------------------------------------------------------------------------------------------------------------------------------------------------|-------------------------------------------------------------------------------------------------------------------------------------------------------------------------------------------------|---------------------------------------------------------------------------------------------------------|
|           | <ul style="list-style-type: none"> <li>○ Use the vertical line (acts as a number line)</li> <li>○ The further away from head the worse</li> <li>○ Line is from 0 - 4</li> </ul>                                                                                      | <ul style="list-style-type: none"> <li>○ <math>2 &gt; Ha &lt; 4</math></li> <li>○ <math>Ha &gt; 4</math></li> </ul>                                                                             | <ul style="list-style-type: none"> <li>○ 0 to 5</li> <li>○ 0</li> </ul>                                 |
| Hips (Hi) | <ul style="list-style-type: none"> <li>○ Must be side on</li> <li>○ Hips should be in line with each other</li> <li>○ Threshold – measure the distance between the hips</li> <li>○ Use the horizontal line as a number line</li> <li>○ Line is from 0 - 4</li> </ul> | <ul style="list-style-type: none"> <li>○ <math>Hi = 0</math></li> <li>○ <math>0 &gt; Hi &lt; 2</math></li> <li>○ <math>2 &gt; Hi &lt; 4</math></li> <li>○ <math>Hi &gt; 4</math></li> </ul>     | <ul style="list-style-type: none"> <li>○ 0</li> <li>○ 5 to 10</li> <li>○ 0 to 5</li> <li>○ 0</li> </ul> |
| Feet (F)  | <ul style="list-style-type: none"> <li>○ Must be in line with head</li> <li>○ Threshold – measure the feet angle on either side</li> <li>○ Use the horizontal line</li> </ul>                                                                                        | <ul style="list-style-type: none"> <li>○ <math>F = 0'</math></li> <li>○ <math>0' &lt; F &lt; 7'</math></li> <li>○ <math>7' &lt; F &lt; 15'</math></li> <li>○ <math>F &gt; 15'</math></li> </ul> | <ul style="list-style-type: none"> <li>○ 0</li> <li>○ 5 to 10</li> <li>○ 0 to 5</li> <li>○ 0</li> </ul> |

Example score for FF On-Drive

|           |       |
|-----------|-------|
| Head      | 10/10 |
| Shoulders | 4/10  |
| Hands     | 10/10 |
| Hips      | 6/10  |
| Feet      | 10/10 |

Square-Drive

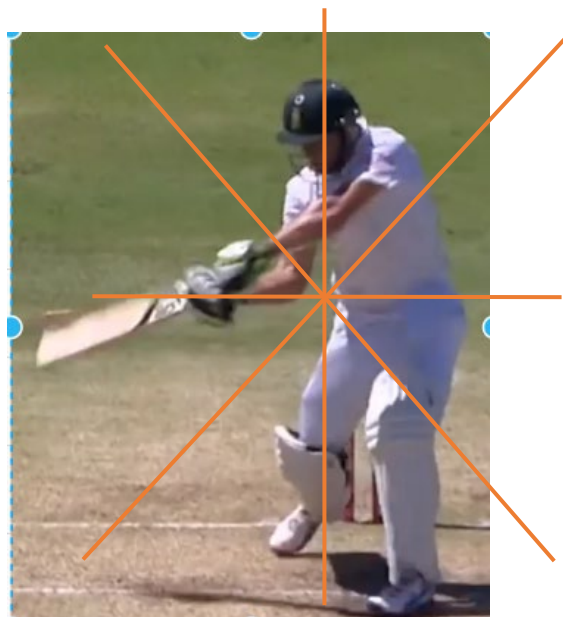

| Body Part    | Rule                                                                                                                                                                                                                                                                 | Scoring Metric                                                                                                                                                                                      | Points                                                                                                  |
|--------------|----------------------------------------------------------------------------------------------------------------------------------------------------------------------------------------------------------------------------------------------------------------------|-----------------------------------------------------------------------------------------------------------------------------------------------------------------------------------------------------|---------------------------------------------------------------------------------------------------------|
| Head (He)    | <ul style="list-style-type: none"> <li>○ Must be in line with feet</li> <li>○ Threshold – measure the head angle on either side</li> <li>○ Use the horizontal line</li> </ul>                                                                                        | <ul style="list-style-type: none"> <li>○ <math>He = 0'</math></li> <li>○ <math>0' &lt; He &lt; 7'</math></li> <li>○ <math>7' &lt; He &lt; 15'</math></li> <li>○ <math>He &gt; 15'</math></li> </ul> | <ul style="list-style-type: none"> <li>○ 0</li> <li>○ 5 to 10</li> <li>○ 0 to 5</li> <li>○ 0</li> </ul> |
| Shoulder (S) | <ul style="list-style-type: none"> <li>○ Must be side on</li> <li>○ Shoulders should be in line with each other</li> <li>○ Threshold – measure the angle between the shoulders</li> <li>○ Use the horizontal line</li> </ul>                                         | <ul style="list-style-type: none"> <li>○ <math>S = 0'</math></li> <li>○ <math>0' &lt; S &lt; 7'</math></li> <li>○ <math>7' &lt; S &lt; 15'</math></li> <li>○ <math>S &gt; 15'</math></li> </ul>     | <ul style="list-style-type: none"> <li>○ 0</li> <li>○ 5 to 10</li> <li>○ 0 to 5</li> <li>○ 0</li> </ul> |
| Hands (Ha)   | <ul style="list-style-type: none"> <li>○ Directly below the batter's eyes</li> <li>○ Use the vertical line (acts as a number line)</li> <li>○ The further away from head the worse</li> <li>○ Line is from 0 - 4</li> </ul>                                          | <ul style="list-style-type: none"> <li>○ <math>Ha = 0</math></li> <li>○ <math>0 &gt; Ha &lt; 2</math></li> <li>○ <math>2 &gt; Ha &lt; 4</math></li> <li>○ <math>Ha &gt; 4</math></li> </ul>         | <ul style="list-style-type: none"> <li>○ 0</li> <li>○ 5 to 10</li> <li>○ 0 to 5</li> <li>○ 0</li> </ul> |
| Hips (Hi)    | <ul style="list-style-type: none"> <li>○ Must be side on</li> <li>○ Hips should be in line with each other</li> <li>○ Threshold – measure the distance between the hips</li> <li>○ Use the horizontal line as a number line</li> <li>○ Line is from 0 - 4</li> </ul> | <ul style="list-style-type: none"> <li>○ <math>Hi = 0</math></li> <li>○ <math>0 &gt; Hi &lt; 2</math></li> <li>○ <math>2 &gt; Hi &lt; 4</math></li> <li>○ <math>Hi &gt; 4</math></li> </ul>         | <ul style="list-style-type: none"> <li>○ 0</li> <li>○ 5 to 10</li> <li>○ 0 to 5</li> <li>○ 0</li> </ul> |
| Feet (F)     | <ul style="list-style-type: none"> <li>○ Must be in line with head</li> <li>○ Threshold – measure the feet angle on either side</li> <li>○ Use the horizontal line</li> </ul>                                                                                        | <ul style="list-style-type: none"> <li>○ <math>F = 0'</math></li> <li>○ <math>0' &lt; F &lt; 7'</math></li> <li>○ <math>7' &lt; F &lt; 15'</math></li> <li>○ <math>F &gt; 15'</math></li> </ul>     | <ul style="list-style-type: none"> <li>○ 0</li> <li>○ 5 to 10</li> <li>○ 0 to 5</li> <li>○ 0</li> </ul> |

Example score for FF Square-Drive

|           |       |
|-----------|-------|
| Head      | 10/10 |
| Shoulders | 4/10  |
| Hands     | 10/10 |
| Hips      | 6/10  |
| Feet      | 10/10 |

## Hook

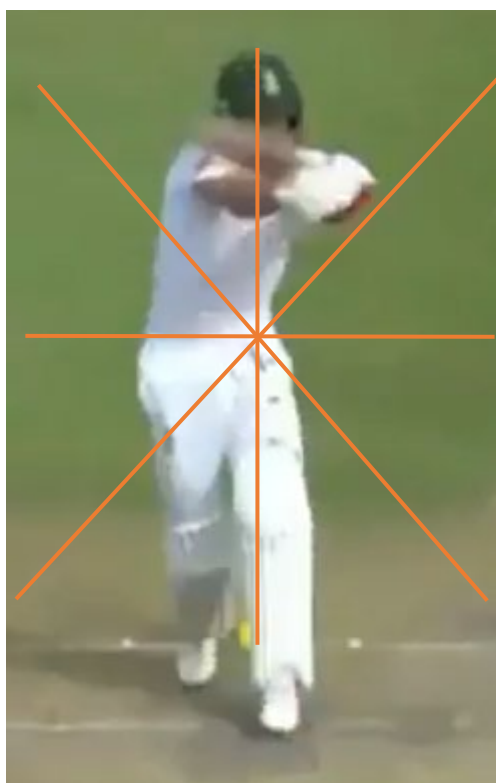

| Body Part    | Rule                                                                                                                                                                                                                         | Scoring Metric                                                                                                                                                                                      | Points                                                                                                  |
|--------------|------------------------------------------------------------------------------------------------------------------------------------------------------------------------------------------------------------------------------|-----------------------------------------------------------------------------------------------------------------------------------------------------------------------------------------------------|---------------------------------------------------------------------------------------------------------|
| Head (He)    | <ul style="list-style-type: none"> <li>○ Must be in line with feet</li> <li>○ Threshold – measure the head angle on either side</li> <li>○ Use the horizontal line</li> </ul>                                                | <ul style="list-style-type: none"> <li>○ <math>He = 0'</math></li> <li>○ <math>0' &lt; He &lt; 7'</math></li> <li>○ <math>7' &lt; He &lt; 15'</math></li> <li>○ <math>He &gt; 15'</math></li> </ul> | <ul style="list-style-type: none"> <li>○ 0</li> <li>○ 5 to 10</li> <li>○ 0 to 5</li> <li>○ 0</li> </ul> |
| Shoulder (S) | <ul style="list-style-type: none"> <li>○ Must be side on</li> <li>○ Shoulders should be in line with each other</li> <li>○ Threshold – measure the angle between the shoulders</li> <li>○ Use the horizontal line</li> </ul> | <ul style="list-style-type: none"> <li>○ <math>S = 0'</math></li> <li>○ <math>0' &lt; S &lt; 7'</math></li> <li>○ <math>7' &lt; S &lt; 15'</math></li> <li>○ <math>S &gt; 15'</math></li> </ul>     | <ul style="list-style-type: none"> <li>○ 0</li> <li>○ 5 to 10</li> <li>○ 0 to 5</li> <li>○ 0</li> </ul> |
| Hands (Ha)   | <ul style="list-style-type: none"> <li>○ Directly below the batter's eyes</li> <li>○ Use the vertical line (acts as a number line)</li> <li>○ The further away from head the worse</li> <li>○ Line is from 0 - 4</li> </ul>  | <ul style="list-style-type: none"> <li>○ <math>Ha = 0</math></li> <li>○ <math>0 &gt; Ha &lt; 2</math></li> <li>○ <math>2 &gt; Ha &lt; 4</math></li> <li>○ <math>Ha &gt; 4</math></li> </ul>         | <ul style="list-style-type: none"> <li>○ 0</li> <li>○ 5 to 10</li> <li>○ 0 to 5</li> <li>○ 0</li> </ul> |
| Hips (Hi)    | <ul style="list-style-type: none"> <li>○ Must be side on</li> <li>○ Hips should be in line with each other</li> <li>○ Threshold – measure the distance between the hips</li> </ul>                                           | <ul style="list-style-type: none"> <li>○ <math>Hi = 0</math></li> <li>○ <math>0 &gt; Hi &lt; 2</math></li> <li>○ <math>2 &gt; Hi &lt; 4</math></li> <li>○ <math>Hi &gt; 4</math></li> </ul>         | <ul style="list-style-type: none"> <li>○ 0</li> <li>○ 5 to 10</li> <li>○ 0 to 5</li> <li>○ 0</li> </ul> |

|          |                                                                                                                                                                               |                                                                                                                                                                                                 |                                                                                                         |
|----------|-------------------------------------------------------------------------------------------------------------------------------------------------------------------------------|-------------------------------------------------------------------------------------------------------------------------------------------------------------------------------------------------|---------------------------------------------------------------------------------------------------------|
|          | <ul style="list-style-type: none"> <li>○ Use the horizontal line as a number line</li> <li>○ Line is from 0 - 4</li> </ul>                                                    |                                                                                                                                                                                                 |                                                                                                         |
| Feet (F) | <ul style="list-style-type: none"> <li>○ Must be in line with head</li> <li>○ Threshold – measure the feet angle on either side</li> <li>○ Use the horizontal line</li> </ul> | <ul style="list-style-type: none"> <li>○ <math>F = 0'</math></li> <li>○ <math>0' &lt; F &lt; 7'</math></li> <li>○ <math>7' &lt; F &lt; 15'</math></li> <li>○ <math>F &gt; 15'</math></li> </ul> | <ul style="list-style-type: none"> <li>○ 0</li> <li>○ 5 to 10</li> <li>○ 0 to 5</li> <li>○ 0</li> </ul> |

Example score for FF Hook

|           |       |
|-----------|-------|
| Head      | 10/10 |
| Shoulders | 4/10  |
| Hands     | 10/10 |
| Hips      | 6/10  |
| Feet      | 10/10 |

Glance

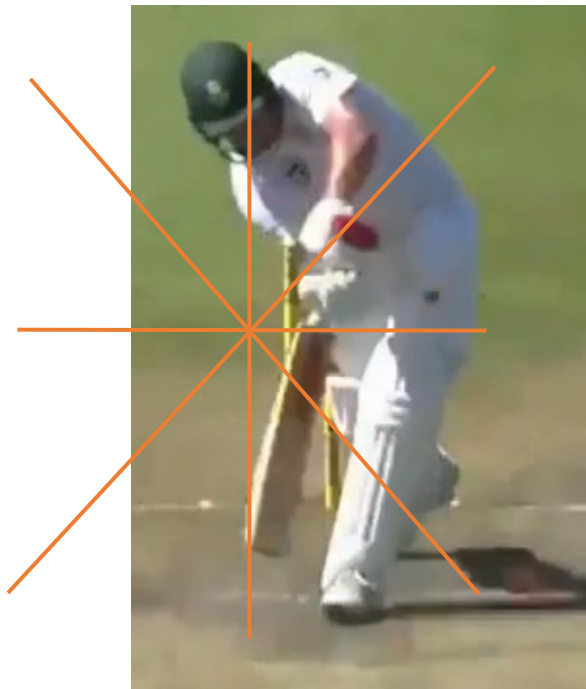

| Body Part    | Rule                                                                                                                                                                                                                         | Scoring Metric                                                                                                                                                                                      | Points                                                                                                  |
|--------------|------------------------------------------------------------------------------------------------------------------------------------------------------------------------------------------------------------------------------|-----------------------------------------------------------------------------------------------------------------------------------------------------------------------------------------------------|---------------------------------------------------------------------------------------------------------|
| Head (He)    | <ul style="list-style-type: none"> <li>○ Must be in line with feet</li> <li>○ Threshold – measure the head angle on either side</li> <li>○ Use the horizontal line</li> </ul>                                                | <ul style="list-style-type: none"> <li>○ <math>He = 0'</math></li> <li>○ <math>0' &lt; He &lt; 7'</math></li> <li>○ <math>7' &lt; He &lt; 15'</math></li> <li>○ <math>He &gt; 15'</math></li> </ul> | <ul style="list-style-type: none"> <li>○ 0</li> <li>○ 5 to 10</li> <li>○ 0 to 5</li> <li>○ 0</li> </ul> |
| Shoulder (S) | <ul style="list-style-type: none"> <li>○ Must be side on</li> <li>○ Shoulders should be in line with each other</li> <li>○ Threshold – measure the angle between the shoulders</li> <li>○ Use the horizontal line</li> </ul> | <ul style="list-style-type: none"> <li>○ <math>S = 0'</math></li> <li>○ <math>0' &lt; S &lt; 7'</math></li> <li>○ <math>7' &lt; S &lt; 15'</math></li> <li>○ <math>S &gt; 15'</math></li> </ul>     | <ul style="list-style-type: none"> <li>○ 0</li> <li>○ 5 to 10</li> <li>○ 0 to 5</li> <li>○ 0</li> </ul> |

|            |                                                                                                                                                                                                                                                                      |                                                                                                                                                                       |                                                                                                         |
|------------|----------------------------------------------------------------------------------------------------------------------------------------------------------------------------------------------------------------------------------------------------------------------|-----------------------------------------------------------------------------------------------------------------------------------------------------------------------|---------------------------------------------------------------------------------------------------------|
| Hands (Ha) | <ul style="list-style-type: none"> <li>○ Directly below the batter's eyes</li> <li>○ Use the vertical line (acts as a number line)</li> <li>○ The further away from head the worse</li> <li>○ Line is from 0 - 4</li> </ul>                                          | <ul style="list-style-type: none"> <li>○ Ha = 0</li> <li>○ <math>0 &gt; Ha &lt; 2</math></li> <li>○ <math>2 &gt; Ha &lt; 4</math></li> <li>○ Ha &gt; 4</li> </ul>     | <ul style="list-style-type: none"> <li>○ 0</li> <li>○ 5 to 10</li> <li>○ 0 to 5</li> <li>○ 0</li> </ul> |
| Hips (Hi)  | <ul style="list-style-type: none"> <li>○ Must be side on</li> <li>○ Hips should be in line with each other</li> <li>○ Threshold – measure the distance between the hips</li> <li>○ Use the horizontal line as a number line</li> <li>○ Line is from 0 - 4</li> </ul> | <ul style="list-style-type: none"> <li>○ Hi = 0</li> <li>○ <math>0 &gt; Hi &lt; 2</math></li> <li>○ <math>2 &gt; Hi &lt; 4</math></li> <li>○ Hi &gt; 4</li> </ul>     | <ul style="list-style-type: none"> <li>○ 0</li> <li>○ 5 to 10</li> <li>○ 0 to 5</li> <li>○ 0</li> </ul> |
| Feet (F)   | <ul style="list-style-type: none"> <li>○ Must be in line with head</li> <li>○ Threshold – measure the feet angle on either side</li> <li>○ Use the horizontal line</li> </ul>                                                                                        | <ul style="list-style-type: none"> <li>○ F = 0'</li> <li>○ <math>0' &lt; F &lt; 7'</math></li> <li>○ <math>7' &lt; F &lt; 15'</math></li> <li>○ F &gt; 15'</li> </ul> | <ul style="list-style-type: none"> <li>○ 0</li> <li>○ 5 to 10</li> <li>○ 0 to 5</li> <li>○ 0</li> </ul> |

Example score for FF Glance

|           |       |
|-----------|-------|
| Head      | 10/10 |
| Shoulders | 4/10  |
| Hands     | 10/10 |
| Hips      | 6/10  |
| Feet      | 10/10 |

Sweep

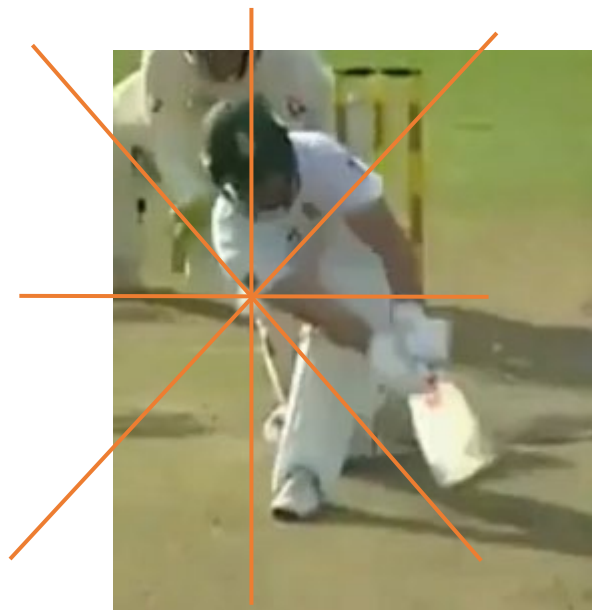

| Body Part    | Rule                                                                                                                                                                                                                                                                 | Scoring Metric                                                                                                                                                                                      | Points                                                                                                  |
|--------------|----------------------------------------------------------------------------------------------------------------------------------------------------------------------------------------------------------------------------------------------------------------------|-----------------------------------------------------------------------------------------------------------------------------------------------------------------------------------------------------|---------------------------------------------------------------------------------------------------------|
| Head (He)    | <ul style="list-style-type: none"> <li>○ Must be in line with feet</li> <li>○ Threshold – measure the head angle on either side</li> <li>○ Use the horizontal line</li> </ul>                                                                                        | <ul style="list-style-type: none"> <li>○ <math>He = 0'</math></li> <li>○ <math>0' &lt; He &lt; 7'</math></li> <li>○ <math>7' &lt; He &lt; 15'</math></li> <li>○ <math>He &gt; 15'</math></li> </ul> | <ul style="list-style-type: none"> <li>○ 0</li> <li>○ 5 to 10</li> <li>○ 0 to 5</li> <li>○ 0</li> </ul> |
| Shoulder (S) | <ul style="list-style-type: none"> <li>○ Must be side on</li> <li>○ Shoulders should be in line with each other</li> <li>○ Threshold – measure the angle between the shoulders</li> <li>○ Use the horizontal line</li> </ul>                                         | <ul style="list-style-type: none"> <li>○ <math>S = 0'</math></li> <li>○ <math>0' &lt; S &lt; 7'</math></li> <li>○ <math>7' &lt; S &lt; 15'</math></li> <li>○ <math>S &gt; 15'</math></li> </ul>     | <ul style="list-style-type: none"> <li>○ 0</li> <li>○ 5 to 10</li> <li>○ 0 to 5</li> <li>○ 0</li> </ul> |
| Hands (Ha)   | <ul style="list-style-type: none"> <li>○ Directly below the batter's eyes</li> <li>○ Use the vertical line (acts as a number line)</li> <li>○ The further away from head the worse</li> <li>○ Line is from 0 - 4</li> </ul>                                          | <ul style="list-style-type: none"> <li>○ <math>Ha = 0</math></li> <li>○ <math>0 &gt; Ha &lt; 2</math></li> <li>○ <math>2 &gt; Ha &lt; 4</math></li> <li>○ <math>Ha &gt; 4</math></li> </ul>         | <ul style="list-style-type: none"> <li>○ 0</li> <li>○ 5 to 10</li> <li>○ 0 to 5</li> <li>○ 0</li> </ul> |
| Hips (Hi)    | <ul style="list-style-type: none"> <li>○ Must be side on</li> <li>○ Hips should be in line with each other</li> <li>○ Threshold – measure the distance between the hips</li> <li>○ Use the horizontal line as a number line</li> <li>○ Line is from 0 - 4</li> </ul> | <ul style="list-style-type: none"> <li>○ <math>Hi = 0</math></li> <li>○ <math>0 &gt; Hi &lt; 2</math></li> <li>○ <math>2 &gt; Hi &lt; 4</math></li> <li>○ <math>Hi &gt; 4</math></li> </ul>         | <ul style="list-style-type: none"> <li>○ 0</li> <li>○ 5 to 10</li> <li>○ 0 to 5</li> <li>○ 0</li> </ul> |
| Feet (F)     | <ul style="list-style-type: none"> <li>○ Must be in line with head</li> <li>○ Threshold – measure the feet angle on either side</li> <li>○ Use the horizontal line</li> </ul>                                                                                        | <ul style="list-style-type: none"> <li>○ <math>F = 0'</math></li> <li>○ <math>0' &lt; F &lt; 7'</math></li> <li>○ <math>7' &lt; F &lt; 15'</math></li> <li>○ <math>F &gt; 15'</math></li> </ul>     | <ul style="list-style-type: none"> <li>○ 0</li> <li>○ 5 to 10</li> <li>○ 0 to 5</li> <li>○ 0</li> </ul> |

Example score for FF Sweep

|           |       |
|-----------|-------|
| Head      | 10/10 |
| Shoulders | 4/10  |
| Hands     | 10/10 |
| Hips      | 6/10  |
| Feet      | 10/10 |



Block – Kane Williamson

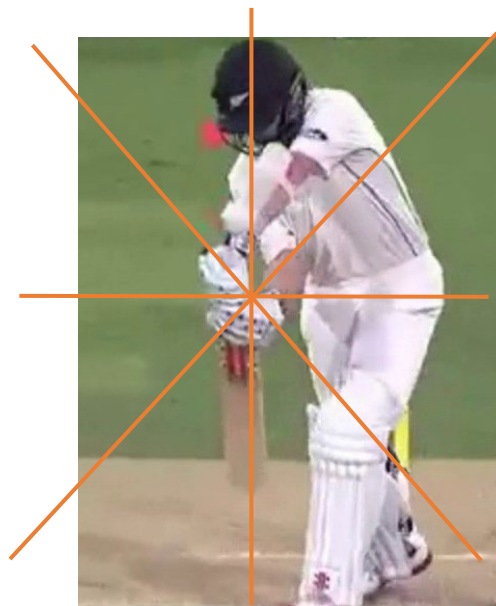

| Body Part    | Rule                                                                                                                                                                                                                                                                 | Scoring Metric                                                                                                                                                                                      | Points                                                                                                  |
|--------------|----------------------------------------------------------------------------------------------------------------------------------------------------------------------------------------------------------------------------------------------------------------------|-----------------------------------------------------------------------------------------------------------------------------------------------------------------------------------------------------|---------------------------------------------------------------------------------------------------------|
| Head (He)    | <ul style="list-style-type: none"> <li>○ Must be in line with feet</li> <li>○ Threshold – measure the head angle on either side</li> <li>○ Use the horizontal line</li> </ul>                                                                                        | <ul style="list-style-type: none"> <li>○ <math>He = 0'</math></li> <li>○ <math>0' &lt; He &lt; 7'</math></li> <li>○ <math>7' &lt; He &lt; 15'</math></li> <li>○ <math>He &gt; 15'</math></li> </ul> | <ul style="list-style-type: none"> <li>○ 0</li> <li>○ 5 to 10</li> <li>○ 0 to 5</li> <li>○ 0</li> </ul> |
| Shoulder (S) | <ul style="list-style-type: none"> <li>○ Must be side on</li> <li>○ Shoulders should be in line with each other</li> <li>○ Threshold – measure the angle between the shoulders</li> <li>○ Use the horizontal line</li> </ul>                                         | <ul style="list-style-type: none"> <li>○ <math>S = 0'</math></li> <li>○ <math>0' &lt; S &lt; 7'</math></li> <li>○ <math>7' &lt; S &lt; 15'</math></li> <li>○ <math>S &gt; 15'</math></li> </ul>     | <ul style="list-style-type: none"> <li>○ 0</li> <li>○ 5 to 10</li> <li>○ 0 to 5</li> <li>○ 0</li> </ul> |
| Hands (Ha)   | <ul style="list-style-type: none"> <li>○ Directly below the batter's eyes</li> <li>○ Use the vertical line (acts as a number line)</li> <li>○ The further away from head the worse</li> <li>○ Line is from 0 - 4</li> </ul>                                          | <ul style="list-style-type: none"> <li>○ <math>Ha = 0</math></li> <li>○ <math>0 &gt; Ha &lt; 2</math></li> <li>○ <math>2 &gt; Ha &lt; 4</math></li> <li>○ <math>Ha &gt; 4</math></li> </ul>         | <ul style="list-style-type: none"> <li>○ 0</li> <li>○ 5 to 10</li> <li>○ 0 to 5</li> <li>○ 0</li> </ul> |
| Hips (Hi)    | <ul style="list-style-type: none"> <li>○ Must be side on</li> <li>○ Hips should be in line with each other</li> <li>○ Threshold – measure the distance between the hips</li> <li>○ Use the horizontal line as a number line</li> <li>○ Line is from 0 - 4</li> </ul> | <ul style="list-style-type: none"> <li>○ <math>Hi = 0</math></li> <li>○ <math>0 &gt; Hi &lt; 2</math></li> <li>○ <math>2 &gt; Hi &lt; 4</math></li> <li>○ <math>Hi &gt; 4</math></li> </ul>         | <ul style="list-style-type: none"> <li>○ 0</li> <li>○ 5 to 10</li> <li>○ 0 to 5</li> <li>○ 0</li> </ul> |
| Feet (F)     | <ul style="list-style-type: none"> <li>○ Must be in line with head</li> <li>○ Threshold – measure the feet angle on either side</li> </ul>                                                                                                                           | <ul style="list-style-type: none"> <li>○ <math>F = 0'</math></li> <li>○ <math>0' &lt; F &lt; 7'</math></li> <li>○ <math>7' &lt; F &lt; 15'</math></li> </ul>                                        | <ul style="list-style-type: none"> <li>○ 0</li> <li>○ 5 to 10</li> <li>○ 0 to 5</li> </ul>              |

|  |                           |             |     |
|--|---------------------------|-------------|-----|
|  | ○ Use the horizontal line | ○ $F > 15'$ | ○ 0 |
|--|---------------------------|-------------|-----|

Example score for FF Block

|           |       |
|-----------|-------|
| Head      | 10/10 |
| Shoulders | 4/10  |
| Hands     | 10/10 |
| Hips      | 6/10  |
| Feet      | 10/10 |

## Back Foot

Off-Drive - Unknown

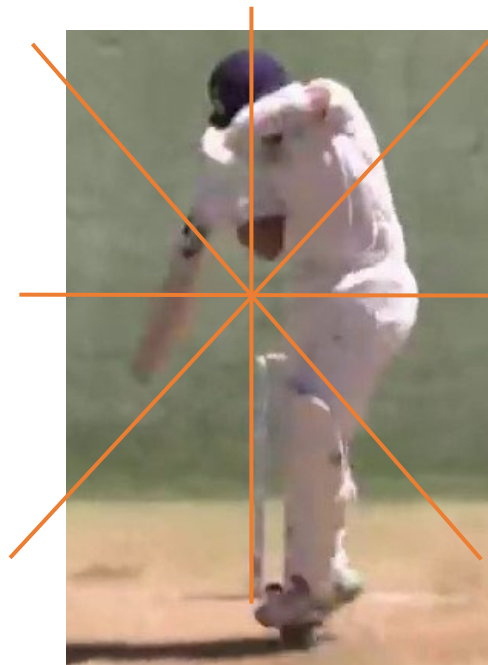

| Body Part    | Rule                                                                                                                                                                                                                         | Scoring Metric                                                                                                                                                                                      | Points                                                                                                  |
|--------------|------------------------------------------------------------------------------------------------------------------------------------------------------------------------------------------------------------------------------|-----------------------------------------------------------------------------------------------------------------------------------------------------------------------------------------------------|---------------------------------------------------------------------------------------------------------|
| Head (He)    | <ul style="list-style-type: none"> <li>○ Must be in line with feet</li> <li>○ Threshold – measure the head angle on either side</li> <li>○ Use the horizontal line</li> </ul>                                                | <ul style="list-style-type: none"> <li>○ <math>He = 0'</math></li> <li>○ <math>0' &lt; He &lt; 7'</math></li> <li>○ <math>7' &lt; He &lt; 15'</math></li> <li>○ <math>He &gt; 15'</math></li> </ul> | <ul style="list-style-type: none"> <li>○ 0</li> <li>○ 5 to 10</li> <li>○ 0 to 5</li> <li>○ 0</li> </ul> |
| Shoulder (S) | <ul style="list-style-type: none"> <li>○ Must be side on</li> <li>○ Shoulders should be in line with each other</li> <li>○ Threshold – measure the angle between the shoulders</li> <li>○ Use the horizontal line</li> </ul> | <ul style="list-style-type: none"> <li>○ <math>S = 0'</math></li> <li>○ <math>0' &lt; S &lt; 7'</math></li> <li>○ <math>7' &lt; S &lt; 15'</math></li> <li>○ <math>S &gt; 15'</math></li> </ul>     | <ul style="list-style-type: none"> <li>○ 0</li> <li>○ 5 to 10</li> <li>○ 0 to 5</li> <li>○ 0</li> </ul> |
| Hands (Ha)   | <ul style="list-style-type: none"> <li>○ Directly below the batter's eyes</li> <li>○ Use the vertical line (acts as a number line)</li> </ul>                                                                                | <ul style="list-style-type: none"> <li>○ <math>Ha = 0</math></li> <li>○ <math>0 &gt; Ha &lt; 2</math></li> <li>○ <math>2 &gt; Ha &lt; 4</math></li> <li>○ <math>Ha &gt; 4</math></li> </ul>         | <ul style="list-style-type: none"> <li>○ 0</li> <li>○ 5 to 10</li> <li>○ 0 to 5</li> <li>○ 0</li> </ul> |

|           |                                                                                                                                                                                                                                                                      |                                                                                                                                                                                                 |                                                                                                         |
|-----------|----------------------------------------------------------------------------------------------------------------------------------------------------------------------------------------------------------------------------------------------------------------------|-------------------------------------------------------------------------------------------------------------------------------------------------------------------------------------------------|---------------------------------------------------------------------------------------------------------|
|           | <ul style="list-style-type: none"> <li>○ The further away from head the worse</li> <li>○ Line is from 0 - 4</li> </ul>                                                                                                                                               |                                                                                                                                                                                                 |                                                                                                         |
| Hips (Hi) | <ul style="list-style-type: none"> <li>○ Must be side on</li> <li>○ Hips should be in line with each other</li> <li>○ Threshold – measure the distance between the hips</li> <li>○ Use the horizontal line as a number line</li> <li>○ Line is from 0 - 4</li> </ul> | <ul style="list-style-type: none"> <li>○ <math>Hi = 0</math></li> <li>○ <math>0 &gt; Hi &lt; 2</math></li> <li>○ <math>2 &gt; Hi &lt; 4</math></li> <li>○ <math>Hi &gt; 4</math></li> </ul>     | <ul style="list-style-type: none"> <li>○ 0</li> <li>○ 5 to 10</li> <li>○ 0 to 5</li> <li>○ 0</li> </ul> |
| Feet (F)  | <ul style="list-style-type: none"> <li>○ Must be in line with head</li> <li>○ Threshold – measure the feet angle on either side</li> <li>○ Use the horizontal line</li> </ul>                                                                                        | <ul style="list-style-type: none"> <li>○ <math>F = 0'</math></li> <li>○ <math>0' &lt; F &lt; 7'</math></li> <li>○ <math>7' &lt; F &lt; 15'</math></li> <li>○ <math>F &gt; 15'</math></li> </ul> | <ul style="list-style-type: none"> <li>○ 0</li> <li>○ 5 to 10</li> <li>○ 0 to 5</li> <li>○ 0</li> </ul> |

Example score for BF off-drive

|           |       |
|-----------|-------|
| Head      | 10/10 |
| Shoulders | 4/10  |
| Hands     | 10/10 |
| Hips      | 6/10  |
| Feet      | 10/10 |

On-Drive – Batter must be on back foot!

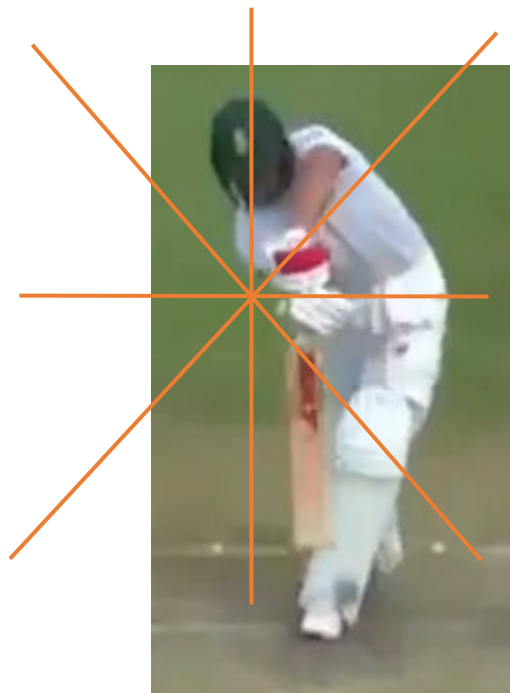

| Body Part    | Rule                                                                                                                                                                                                                                                                 | Scoring Metric                                                                                                                                                                                      | Points                                                                                                  |
|--------------|----------------------------------------------------------------------------------------------------------------------------------------------------------------------------------------------------------------------------------------------------------------------|-----------------------------------------------------------------------------------------------------------------------------------------------------------------------------------------------------|---------------------------------------------------------------------------------------------------------|
| Head (He)    | <ul style="list-style-type: none"> <li>○ Must be in line with feet</li> <li>○ Threshold – measure the head angle on either side</li> <li>○ Use the horizontal line</li> </ul>                                                                                        | <ul style="list-style-type: none"> <li>○ <math>He = 0'</math></li> <li>○ <math>0' &lt; He &lt; 7'</math></li> <li>○ <math>7' &lt; He &lt; 15'</math></li> <li>○ <math>He &gt; 15'</math></li> </ul> | <ul style="list-style-type: none"> <li>○ 0</li> <li>○ 5 to 10</li> <li>○ 0 to 5</li> <li>○ 0</li> </ul> |
| Shoulder (S) | <ul style="list-style-type: none"> <li>○ Must be side on</li> <li>○ Shoulders should be in line with each other</li> <li>○ Threshold – measure the angle between the shoulders</li> <li>○ Use the horizontal line</li> </ul>                                         | <ul style="list-style-type: none"> <li>○ <math>S = 0'</math></li> <li>○ <math>0' &lt; S &lt; 7'</math></li> <li>○ <math>7' &lt; S &lt; 15'</math></li> <li>○ <math>S &gt; 15'</math></li> </ul>     | <ul style="list-style-type: none"> <li>○ 0</li> <li>○ 5 to 10</li> <li>○ 0 to 5</li> <li>○ 0</li> </ul> |
| Hands (Ha)   | <ul style="list-style-type: none"> <li>○ Directly below the batter's eyes</li> <li>○ Use the vertical line (acts as a number line)</li> <li>○ The further away from head the worse</li> <li>○ Line is from 0 - 4</li> </ul>                                          | <ul style="list-style-type: none"> <li>○ <math>Ha = 0</math></li> <li>○ <math>0 &gt; Ha &lt; 2</math></li> <li>○ <math>2 &gt; Ha &lt; 4</math></li> <li>○ <math>Ha &gt; 4</math></li> </ul>         | <ul style="list-style-type: none"> <li>○ 0</li> <li>○ 5 to 10</li> <li>○ 0 to 5</li> <li>○ 0</li> </ul> |
| Hips (Hi)    | <ul style="list-style-type: none"> <li>○ Must be side on</li> <li>○ Hips should be in line with each other</li> <li>○ Threshold – measure the distance between the hips</li> <li>○ Use the horizontal line as a number line</li> <li>○ Line is from 0 - 4</li> </ul> | <ul style="list-style-type: none"> <li>○ <math>Hi = 0</math></li> <li>○ <math>0 &gt; Hi &lt; 2</math></li> <li>○ <math>2 &gt; Hi &lt; 4</math></li> <li>○ <math>Hi &gt; 4</math></li> </ul>         | <ul style="list-style-type: none"> <li>○ 0</li> <li>○ 5 to 10</li> <li>○ 0 to 5</li> <li>○ 0</li> </ul> |
| Feet (F)     | <ul style="list-style-type: none"> <li>○ Must be in line with head</li> <li>○ Threshold – measure the feet angle on either side</li> <li>○ Use the horizontal line</li> </ul>                                                                                        | <ul style="list-style-type: none"> <li>○ <math>F = 0'</math></li> <li>○ <math>0' &lt; F &lt; 7'</math></li> <li>○ <math>7' &lt; F &lt; 15'</math></li> <li>○ <math>F &gt; 15'</math></li> </ul>     | <ul style="list-style-type: none"> <li>○ 0</li> <li>○ 5 to 10</li> <li>○ 0 to 5</li> <li>○ 0</li> </ul> |

Example score for BF On-Drive

|           |       |
|-----------|-------|
| Head      | 10/10 |
| Shoulders | 4/10  |
| Hands     | 10/10 |
| Hips      | 6/10  |
| Feet      | 10/10 |

## Cut

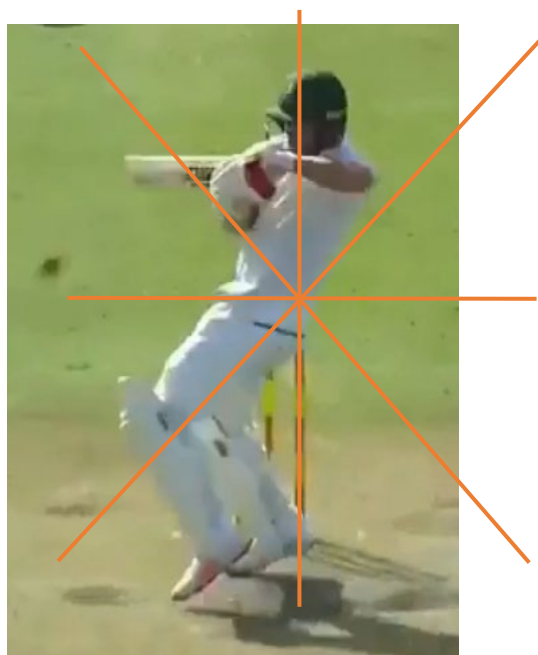

| Body Part    | Rule                                                                                                                                                                                                                                                                 | Scoring Metric                                                                                                                                                                                      | Points                                                                                                  |
|--------------|----------------------------------------------------------------------------------------------------------------------------------------------------------------------------------------------------------------------------------------------------------------------|-----------------------------------------------------------------------------------------------------------------------------------------------------------------------------------------------------|---------------------------------------------------------------------------------------------------------|
| Head (He)    | <ul style="list-style-type: none"> <li>○ Must be in line with feet</li> <li>○ Threshold – measure the head angle on either side</li> <li>○ Use the horizontal line</li> </ul>                                                                                        | <ul style="list-style-type: none"> <li>○ <math>He = 0'</math></li> <li>○ <math>0' &lt; He &lt; 7'</math></li> <li>○ <math>7' &lt; He &lt; 15'</math></li> <li>○ <math>He &gt; 15'</math></li> </ul> | <ul style="list-style-type: none"> <li>○ 0</li> <li>○ 5 to 10</li> <li>○ 0 to 5</li> <li>○ 0</li> </ul> |
| Shoulder (S) | <ul style="list-style-type: none"> <li>○ Must be side on</li> <li>○ Shoulders should be in line with each other</li> <li>○ Threshold – measure the angle between the shoulders</li> <li>○ Use the horizontal line</li> </ul>                                         | <ul style="list-style-type: none"> <li>○ <math>S = 0'</math></li> <li>○ <math>0' &lt; S &lt; 7'</math></li> <li>○ <math>7' &lt; S &lt; 15'</math></li> <li>○ <math>S &gt; 15'</math></li> </ul>     | <ul style="list-style-type: none"> <li>○ 0</li> <li>○ 5 to 10</li> <li>○ 0 to 5</li> <li>○ 0</li> </ul> |
| Hands (Ha)   | <ul style="list-style-type: none"> <li>○ Directly below the batter's eyes</li> <li>○ Use the vertical line (acts as a number line)</li> <li>○ The further away from head the worse</li> <li>○ Line is from 0 - 4</li> </ul>                                          | <ul style="list-style-type: none"> <li>○ <math>Ha = 0</math></li> <li>○ <math>0 &gt; Ha &lt; 2</math></li> <li>○ <math>2 &gt; Ha &lt; 4</math></li> <li>○ <math>Ha &gt; 4</math></li> </ul>         | <ul style="list-style-type: none"> <li>○ 0</li> <li>○ 5 to 10</li> <li>○ 0 to 5</li> <li>○ 0</li> </ul> |
| Hips (Hi)    | <ul style="list-style-type: none"> <li>○ Must be side on</li> <li>○ Hips should be in line with each other</li> <li>○ Threshold – measure the distance between the hips</li> <li>○ Use the horizontal line as a number line</li> <li>○ Line is from 0 - 4</li> </ul> | <ul style="list-style-type: none"> <li>○ <math>Hi = 0</math></li> <li>○ <math>0 &gt; Hi &lt; 2</math></li> <li>○ <math>2 &gt; Hi &lt; 4</math></li> <li>○ <math>Hi &gt; 4</math></li> </ul>         | <ul style="list-style-type: none"> <li>○ 0</li> <li>○ 5 to 10</li> <li>○ 0 to 5</li> <li>○ 0</li> </ul> |
| Feet (F)     | <ul style="list-style-type: none"> <li>○ Must be in line with head</li> </ul>                                                                                                                                                                                        | <ul style="list-style-type: none"> <li>○ <math>F = 0'</math></li> </ul>                                                                                                                             | <ul style="list-style-type: none"> <li>○ 0</li> </ul>                                                   |

|  |                                                                                                                                          |                                                                                                                                                                  |                                                                                            |
|--|------------------------------------------------------------------------------------------------------------------------------------------|------------------------------------------------------------------------------------------------------------------------------------------------------------------|--------------------------------------------------------------------------------------------|
|  | <ul style="list-style-type: none"> <li>○ Threshold – measure the feet angle on either side</li> <li>○ Use the horizontal line</li> </ul> | <ul style="list-style-type: none"> <li>○ <math>0' &lt; F &lt; 7'</math></li> <li>○ <math>7' &lt; F &lt; 15'</math></li> <li>○ <math>F &gt; 15'</math></li> </ul> | <ul style="list-style-type: none"> <li>○ 5 to 10</li> <li>○ 0 to 5</li> <li>○ 0</li> </ul> |
|--|------------------------------------------------------------------------------------------------------------------------------------------|------------------------------------------------------------------------------------------------------------------------------------------------------------------|--------------------------------------------------------------------------------------------|

Example score for BF Cut

|           |       |
|-----------|-------|
| Head      | 10/10 |
| Shoulders | 4/10  |
| Hands     | 10/10 |
| Hips      | 6/10  |
| Feet      | 10/10 |

Hook

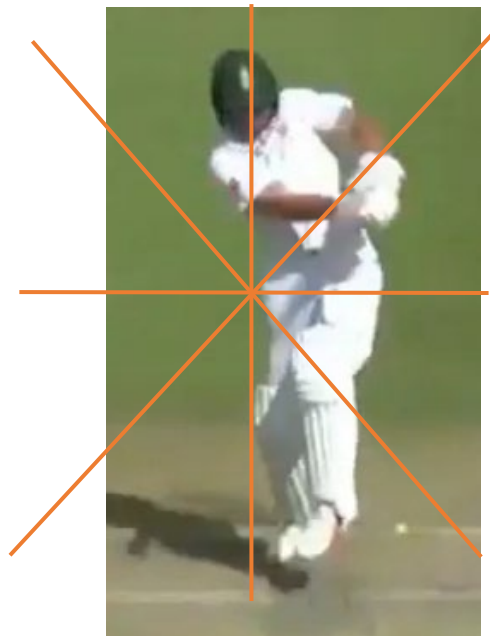

| Body Part    | Rule                                                                                                                                                                                                                         | Scoring Metric                                                                                                                                                                                      | Points                                                                                                  |
|--------------|------------------------------------------------------------------------------------------------------------------------------------------------------------------------------------------------------------------------------|-----------------------------------------------------------------------------------------------------------------------------------------------------------------------------------------------------|---------------------------------------------------------------------------------------------------------|
| Head (He)    | <ul style="list-style-type: none"> <li>○ Must be in line with feet</li> <li>○ Threshold – measure the head angle on either side</li> <li>○ Use the horizontal line</li> </ul>                                                | <ul style="list-style-type: none"> <li>○ <math>He = 0'</math></li> <li>○ <math>0' &lt; He &lt; 7'</math></li> <li>○ <math>7' &lt; He &lt; 15'</math></li> <li>○ <math>He &gt; 15'</math></li> </ul> | <ul style="list-style-type: none"> <li>○ 0</li> <li>○ 5 to 10</li> <li>○ 0 to 5</li> <li>○ 0</li> </ul> |
| Shoulder (S) | <ul style="list-style-type: none"> <li>○ Must be side on</li> <li>○ Shoulders should be in line with each other</li> <li>○ Threshold – measure the angle between the shoulders</li> <li>○ Use the horizontal line</li> </ul> | <ul style="list-style-type: none"> <li>○ <math>S = 0'</math></li> <li>○ <math>0' &lt; S &lt; 7'</math></li> <li>○ <math>7' &lt; S &lt; 15'</math></li> <li>○ <math>S &gt; 15'</math></li> </ul>     | <ul style="list-style-type: none"> <li>○ 0</li> <li>○ 5 to 10</li> <li>○ 0 to 5</li> <li>○ 0</li> </ul> |
| Hands (Ha)   | <ul style="list-style-type: none"> <li>○ Directly below the batter's eyes</li> <li>○ Use the vertical line (acts as a number line)</li> </ul>                                                                                | <ul style="list-style-type: none"> <li>○ <math>Ha = 0</math></li> <li>○ <math>0 &gt; Ha &lt; 2</math></li> <li>○ <math>2 &gt; Ha &lt; 4</math></li> <li>○ <math>Ha &gt; 4</math></li> </ul>         | <ul style="list-style-type: none"> <li>○ 0</li> <li>○ 5 to 10</li> <li>○ 0 to 5</li> <li>○ 0</li> </ul> |

|           |                                                                                                                                                                                                                                                                      |                                                                                                                                                                                                 |                                                                                                         |
|-----------|----------------------------------------------------------------------------------------------------------------------------------------------------------------------------------------------------------------------------------------------------------------------|-------------------------------------------------------------------------------------------------------------------------------------------------------------------------------------------------|---------------------------------------------------------------------------------------------------------|
|           | <ul style="list-style-type: none"> <li>○ The further away from head the worse</li> <li>○ Line is from 0 - 4</li> </ul>                                                                                                                                               |                                                                                                                                                                                                 |                                                                                                         |
| Hips (Hi) | <ul style="list-style-type: none"> <li>○ Must be side on</li> <li>○ Hips should be in line with each other</li> <li>○ Threshold – measure the distance between the hips</li> <li>○ Use the horizontal line as a number line</li> <li>○ Line is from 0 - 4</li> </ul> | <ul style="list-style-type: none"> <li>○ <math>Hi = 0</math></li> <li>○ <math>0 &gt; Hi &lt; 2</math></li> <li>○ <math>2 &gt; Hi &lt; 4</math></li> <li>○ <math>Hi &gt; 4</math></li> </ul>     | <ul style="list-style-type: none"> <li>○ 0</li> <li>○ 5 to 10</li> <li>○ 0 to 5</li> <li>○ 0</li> </ul> |
| Feet (F)  | <ul style="list-style-type: none"> <li>○ Must be in line with head</li> <li>○ Threshold – measure the feet angle on either side</li> <li>○ Use the horizontal line</li> </ul>                                                                                        | <ul style="list-style-type: none"> <li>○ <math>F = 0'</math></li> <li>○ <math>0' &lt; F &lt; 7'</math></li> <li>○ <math>7' &lt; F &lt; 15'</math></li> <li>○ <math>F &gt; 15'</math></li> </ul> | <ul style="list-style-type: none"> <li>○ 0</li> <li>○ 5 to 10</li> <li>○ 0 to 5</li> <li>○ 0</li> </ul> |

Example score for BF Hook

|           |       |
|-----------|-------|
| Head      | 10/10 |
| Shoulders | 4/10  |
| Hands     | 10/10 |
| Hips      | 6/10  |
| Feet      | 10/10 |

Glance

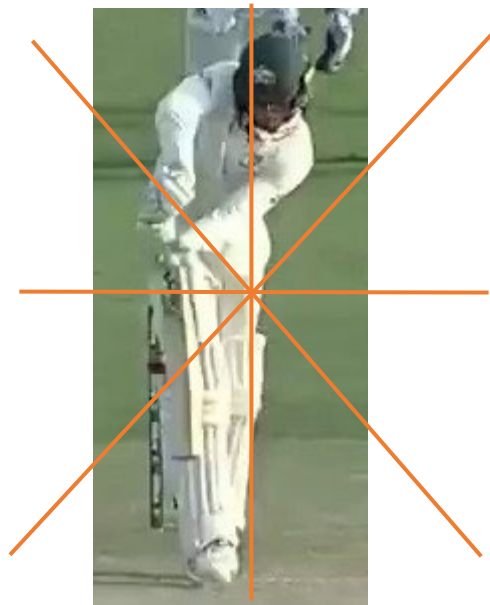

| Body Part | Rule                                                                                                                                       | Scoring Metric                                                                                                                                                  | Points                                                                                     |
|-----------|--------------------------------------------------------------------------------------------------------------------------------------------|-----------------------------------------------------------------------------------------------------------------------------------------------------------------|--------------------------------------------------------------------------------------------|
| Head (He) | <ul style="list-style-type: none"> <li>○ Must be in line with feet</li> <li>○ Threshold – measure the head angle on either side</li> </ul> | <ul style="list-style-type: none"> <li>○ <math>He = 0'</math></li> <li>○ <math>0' &lt; He &lt; 7'</math></li> <li>○ <math>7' &lt; He &lt; 15'</math></li> </ul> | <ul style="list-style-type: none"> <li>○ 0</li> <li>○ 5 to 10</li> <li>○ 0 to 5</li> </ul> |

|              |                                                                                                                                                                                                                                                                      |                                                                                                                                                                                                 |                                                                                                         |
|--------------|----------------------------------------------------------------------------------------------------------------------------------------------------------------------------------------------------------------------------------------------------------------------|-------------------------------------------------------------------------------------------------------------------------------------------------------------------------------------------------|---------------------------------------------------------------------------------------------------------|
|              | <ul style="list-style-type: none"> <li>○ Use the horizontal line</li> </ul>                                                                                                                                                                                          | <ul style="list-style-type: none"> <li>○ <math>He &gt; 15'</math></li> </ul>                                                                                                                    | <ul style="list-style-type: none"> <li>○ 0</li> </ul>                                                   |
| Shoulder (S) | <ul style="list-style-type: none"> <li>○ Must be side on</li> <li>○ Shoulders should be in line with each other</li> <li>○ Threshold – measure the angle between the shoulders</li> <li>○ Use the horizontal line</li> </ul>                                         | <ul style="list-style-type: none"> <li>○ <math>S = 0'</math></li> <li>○ <math>0' &lt; S &lt; 7'</math></li> <li>○ <math>7' &lt; S &lt; 15'</math></li> <li>○ <math>S &gt; 15'</math></li> </ul> | <ul style="list-style-type: none"> <li>○ 0</li> <li>○ 5 to 10</li> <li>○ 0 to 5</li> <li>○ 0</li> </ul> |
| Hands (Ha)   | <ul style="list-style-type: none"> <li>○ Directly below the batter's eyes</li> <li>○ Use the vertical line (acts as a number line)</li> <li>○ The further away from head the worse</li> <li>○ Line is from 0 - 4</li> </ul>                                          | <ul style="list-style-type: none"> <li>○ <math>Ha = 0</math></li> <li>○ <math>0 &gt; Ha &lt; 2</math></li> <li>○ <math>2 &gt; Ha &lt; 4</math></li> <li>○ <math>Ha &gt; 4</math></li> </ul>     | <ul style="list-style-type: none"> <li>○ 0</li> <li>○ 5 to 10</li> <li>○ 0 to 5</li> <li>○ 0</li> </ul> |
| Hips (Hi)    | <ul style="list-style-type: none"> <li>○ Must be side on</li> <li>○ Hips should be in line with each other</li> <li>○ Threshold – measure the distance between the hips</li> <li>○ Use the horizontal line as a number line</li> <li>○ Line is from 0 - 4</li> </ul> | <ul style="list-style-type: none"> <li>○ <math>Hi = 0</math></li> <li>○ <math>0 &gt; Hi &lt; 2</math></li> <li>○ <math>2 &gt; Hi &lt; 4</math></li> <li>○ <math>Hi &gt; 4</math></li> </ul>     | <ul style="list-style-type: none"> <li>○ 0</li> <li>○ 5 to 10</li> <li>○ 0 to 5</li> <li>○ 0</li> </ul> |
| Feet (F)     | <ul style="list-style-type: none"> <li>○ Must be in line with head</li> <li>○ Threshold – measure the feet angle on either side</li> <li>○ Use the horizontal line</li> </ul>                                                                                        | <ul style="list-style-type: none"> <li>○ <math>F = 0'</math></li> <li>○ <math>0' &lt; F &lt; 7'</math></li> <li>○ <math>7' &lt; F &lt; 15'</math></li> <li>○ <math>F &gt; 15'</math></li> </ul> | <ul style="list-style-type: none"> <li>○ 0</li> <li>○ 5 to 10</li> <li>○ 0 to 5</li> <li>○ 0</li> </ul> |

Example score for BF Glance

|           |       |
|-----------|-------|
| Head      | 10/10 |
| Shoulders | 4/10  |
| Hands     | 10/10 |
| Hips      | 6/10  |
| Feet      | 10/10 |



## Block

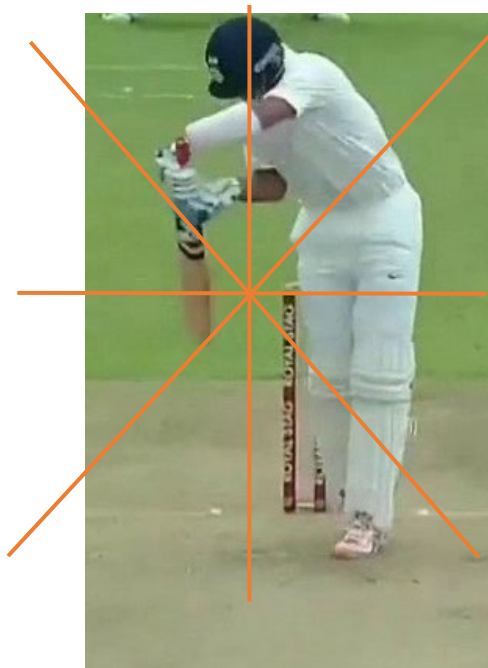

| Body Part    | Rule                                                                                                                                                                                                                                                                 | Scoring Metric                                                                                                                                                                                      | Points                                                                                                  |
|--------------|----------------------------------------------------------------------------------------------------------------------------------------------------------------------------------------------------------------------------------------------------------------------|-----------------------------------------------------------------------------------------------------------------------------------------------------------------------------------------------------|---------------------------------------------------------------------------------------------------------|
| Head (He)    | <ul style="list-style-type: none"> <li>○ Must be in line with feet</li> <li>○ Threshold – measure the head angle on either side</li> <li>○ Use the horizontal line</li> </ul>                                                                                        | <ul style="list-style-type: none"> <li>○ <math>He = 0'</math></li> <li>○ <math>0' &lt; He &lt; 7'</math></li> <li>○ <math>7' &lt; He &lt; 15'</math></li> <li>○ <math>He &gt; 15'</math></li> </ul> | <ul style="list-style-type: none"> <li>○ 0</li> <li>○ 5 to 10</li> <li>○ 0 to 5</li> <li>○ 0</li> </ul> |
| Shoulder (S) | <ul style="list-style-type: none"> <li>○ Must be side on</li> <li>○ Shoulders should be in line with each other</li> <li>○ Threshold – measure the angle between the shoulders</li> <li>○ Use the horizontal line</li> </ul>                                         | <ul style="list-style-type: none"> <li>○ <math>S = 0'</math></li> <li>○ <math>0' &lt; S &lt; 7'</math></li> <li>○ <math>7' &lt; S &lt; 15'</math></li> <li>○ <math>S &gt; 15'</math></li> </ul>     | <ul style="list-style-type: none"> <li>○ 0</li> <li>○ 5 to 10</li> <li>○ 0 to 5</li> <li>○ 0</li> </ul> |
| Hands (Ha)   | <ul style="list-style-type: none"> <li>○ Directly below the batter's eyes</li> <li>○ Use the vertical line (acts as a number line)</li> <li>○ The further away from head the worse</li> <li>○ Line is from 0 - 4</li> </ul>                                          | <ul style="list-style-type: none"> <li>○ <math>Ha = 0</math></li> <li>○ <math>0 &gt; Ha &lt; 2</math></li> <li>○ <math>2 &gt; Ha &lt; 4</math></li> <li>○ <math>Ha &gt; 4</math></li> </ul>         | <ul style="list-style-type: none"> <li>○ 0</li> <li>○ 5 to 10</li> <li>○ 0 to 5</li> <li>○ 0</li> </ul> |
| Hips (Hi)    | <ul style="list-style-type: none"> <li>○ Must be side on</li> <li>○ Hips should be in line with each other</li> <li>○ Threshold – measure the distance between the hips</li> <li>○ Use the horizontal line as a number line</li> <li>○ Line is from 0 - 4</li> </ul> | <ul style="list-style-type: none"> <li>○ <math>Hi = 0</math></li> <li>○ <math>0 &gt; Hi &lt; 2</math></li> <li>○ <math>2 &gt; Hi &lt; 4</math></li> <li>○ <math>Hi &gt; 4</math></li> </ul>         | <ul style="list-style-type: none"> <li>○ 0</li> <li>○ 5 to 10</li> <li>○ 0 to 5</li> <li>○ 0</li> </ul> |
| Feet (F)     | <ul style="list-style-type: none"> <li>○ Must be in line with head</li> <li>○ Threshold – measure the feet angle on either side</li> </ul>                                                                                                                           | <ul style="list-style-type: none"> <li>○ <math>F = 0'</math></li> <li>○ <math>0' &lt; F &lt; 7'</math></li> <li>○ <math>7' &lt; F &lt; 15'</math></li> </ul>                                        | <ul style="list-style-type: none"> <li>○ 0</li> <li>○ 5 to 10</li> <li>○ 0 to 5</li> </ul>              |

|  |                           |             |     |
|--|---------------------------|-------------|-----|
|  | ○ Use the horizontal line | ○ $F > 15'$ | ○ 0 |
|--|---------------------------|-------------|-----|

Example score for BF Block

|           |       |
|-----------|-------|
| Head      | 10/10 |
| Shoulders | 4/10  |
| Hands     | 10/10 |
| Hips      | 6/10  |
| Feet      | 10/10 |

## Follow Through Phase – After contact (continuation of movement)

General rule is that batter should continue with natural movement

| Body Part    | Rule                                                                                                                                                                                                                                                                 | Scoring Metric                                                                                                                                                                                      | Points                                                                                                  |
|--------------|----------------------------------------------------------------------------------------------------------------------------------------------------------------------------------------------------------------------------------------------------------------------|-----------------------------------------------------------------------------------------------------------------------------------------------------------------------------------------------------|---------------------------------------------------------------------------------------------------------|
| Head (He)    | <ul style="list-style-type: none"> <li>○ Must be in line with feet</li> <li>○ Threshold – measure the head angle on either side</li> <li>○ Use the horizontal line</li> </ul>                                                                                        | <ul style="list-style-type: none"> <li>○ <math>He = 0'</math></li> <li>○ <math>0' &lt; He &lt; 7'</math></li> <li>○ <math>7' &lt; He &lt; 15'</math></li> <li>○ <math>He &gt; 15'</math></li> </ul> | <ul style="list-style-type: none"> <li>○ 0</li> <li>○ 5 to 10</li> <li>○ 0 to 5</li> <li>○ 0</li> </ul> |
| Shoulder (S) | <ul style="list-style-type: none"> <li>○ Must be side on</li> <li>○ Shoulders should be in line with each other</li> <li>○ Threshold – measure the angle between the shoulders</li> <li>○ Use the horizontal line</li> </ul>                                         | <ul style="list-style-type: none"> <li>○ <math>S = 0'</math></li> <li>○ <math>0' &lt; S &lt; 7'</math></li> <li>○ <math>7' &lt; S &lt; 15'</math></li> <li>○ <math>S &gt; 15'</math></li> </ul>     | <ul style="list-style-type: none"> <li>○ 0</li> <li>○ 5 to 10</li> <li>○ 0 to 5</li> <li>○ 0</li> </ul> |
| Hands (Ha)   | <ul style="list-style-type: none"> <li>○ Directly below the batter's eyes</li> <li>○ Use the vertical line (acts as a number line)</li> <li>○ The further away from head the worse</li> <li>○ Line is from 0 - 4</li> </ul>                                          | <ul style="list-style-type: none"> <li>○ <math>Ha = 0</math></li> <li>○ <math>0 &gt; Ha &lt; 2</math></li> <li>○ <math>2 &gt; Ha &lt; 4</math></li> <li>○ <math>Ha &gt; 4</math></li> </ul>         | <ul style="list-style-type: none"> <li>○ 0</li> <li>○ 5 to 10</li> <li>○ 0 to 5</li> <li>○ 0</li> </ul> |
| Hips (Hi)    | <ul style="list-style-type: none"> <li>○ Must be side on</li> <li>○ Hips should be in line with each other</li> <li>○ Threshold – measure the distance between the hips</li> <li>○ Use the horizontal line as a number line</li> <li>○ Line is from 0 - 4</li> </ul> | <ul style="list-style-type: none"> <li>○ <math>Hi = 0</math></li> <li>○ <math>0 &gt; Hi &lt; 2</math></li> <li>○ <math>2 &gt; Hi &lt; 4</math></li> <li>○ <math>Hi &gt; 4</math></li> </ul>         | <ul style="list-style-type: none"> <li>○ 0</li> <li>○ 5 to 10</li> <li>○ 0 to 5</li> <li>○ 0</li> </ul> |
| Feet (F)     | <ul style="list-style-type: none"> <li>○ Must be in line with head</li> <li>○ Threshold – measure the feet angle on either side</li> <li>○ Use the horizontal line</li> </ul>                                                                                        | <ul style="list-style-type: none"> <li>○ <math>F = 0'</math></li> <li>○ <math>0' &lt; F &lt; 7'</math></li> <li>○ <math>7' &lt; F &lt; 15'</math></li> <li>○ <math>F &gt; 15'</math></li> </ul>     | <ul style="list-style-type: none"> <li>○ 0</li> <li>○ 5 to 10</li> <li>○ 0 to 5</li> <li>○ 0</li> </ul> |

# Autoencoder

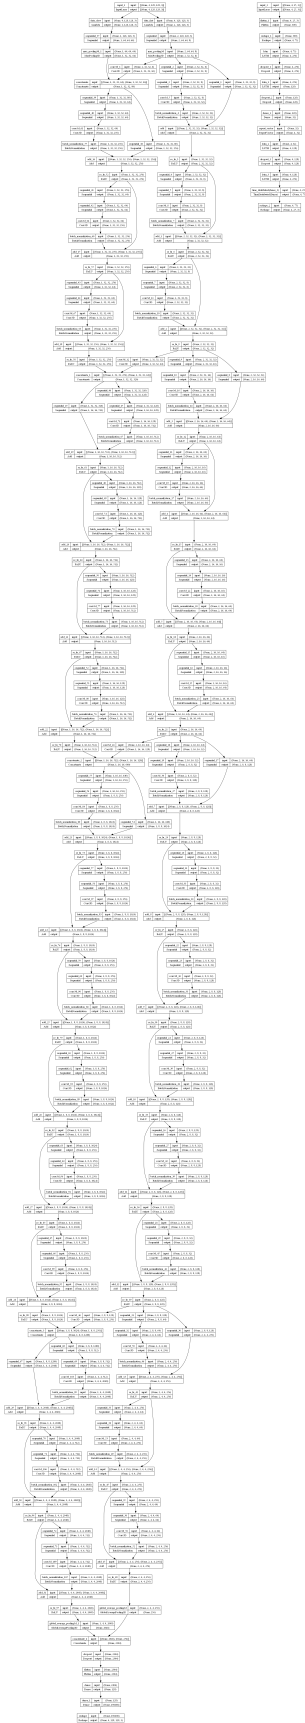

# Aggregation and Regression

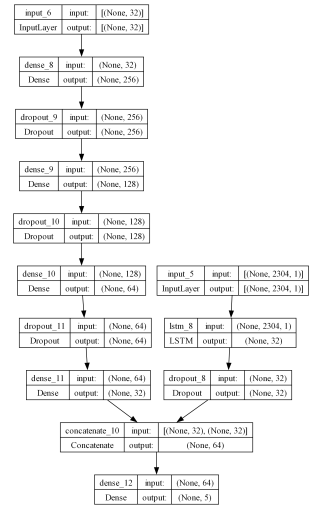

Supplement: Supplementary file 1 [file Moodley_I3D-AE-LSTM_A_2-Stream_WACV_2025_supplemental.pdf]
